# Supplementary material
Source: HighWire-hosted journal article supplement (https://bmjopen.bmj.com/content/15/4/e093129)
Supplement: inline-supplementary-material-1 [file inline-supplementary-material-1.pdf]

**Supplemental File 1.** Test of proportional-hazards assumption to assess the incidence of attrition and its predictors among HIV-infected adolescents receiving antiretroviral therapy in public health hospitals, south Ethiopia, 2024

| Variables                       |  | Categories          | X <sup>2</sup> | DF | P-value |
|---------------------------------|--|---------------------|----------------|----|---------|
| Age                             |  | 15-19               | 1.17           | 1  | 0.2801  |
| Parent status                   |  | Either died         | 0.14           | 1  | 0.7096  |
|                                 |  | Both died           | 1.82           | 1  | 0.1771  |
| Educational status of caregiver |  | No formal education | 2.65           | 1  | 0.1035  |
|                                 |  | Primary             | 1.38           | 1  | 0.2398  |
| CPT prophylaxis                 |  | No                  | 1.54           | 1  | 0.2147  |
| Adherence                       |  | Fair                | 0.38           | 1  | 0.5398  |
|                                 |  | Poor                | 0.00           | 1  | 0.9710  |
| Regimen change                  |  | No                  | 0.28           | 1  | 0.5982  |
| Global test                     |  |                     | 7.76           | 9  | 0.5585  |
